# Supplementary material
Source: PubMed Central journal article supplement (PMC3433600)
Supplement: mmc1.pdf [file mmc1.pdf]

## Supporting material

### Contrasting factors on the kinetic path to protein complex formation diminish the effects of crowding agents

Yael Phillip<sup>1</sup>, Michal Harel<sup>1</sup>, Ruth Khait<sup>1</sup>, Sanbo Qin<sup>2</sup>, Huan-Xiang Zhou<sup>2</sup> and Gideon Schreiber<sup>1</sup>

<sup>1</sup>Department of Biological Chemistry, Weizmann Institute of Science, Rehovot, 76100 Israel.

<sup>2</sup>Department of Physics and Institute of Molecular Biophysics, Florida State University, Tallahassee, FL 32306, USA.

Figure S1

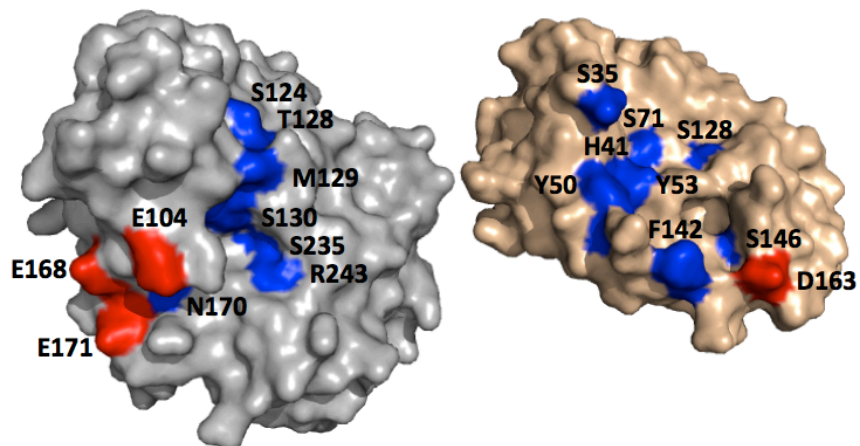

Open-book representation of the TEM1 (left) - BLIP (right) complex. Residues that were involved in interactions with non-significant  $\Delta\Delta G_{\text{int}}^{\ddagger}$  values are colored blue. TEM1 E104, E168, E171 and BLIP D163 that were involved in interactions with significant  $\Delta\Delta G_{\text{int}}^{\ddagger}$  value are colored red.

**Table S1**

$\Delta\Delta G_{\text{int}}^{\ddagger}$  in dextran and distances  
between residues in the final complex

| Ala mutants |       |                 |                                                      | Fast mutants |       |                 |                                                      |
|-------------|-------|-----------------|------------------------------------------------------|--------------|-------|-----------------|------------------------------------------------------|
| TEM1        | BLIP  | Distance<br>(Å) | $\Delta\Delta G_{\text{int}}^{\ddagger}$<br>(kJ/mol) | TEM1         | BLIP  | Distance<br>(Å) | $\Delta\Delta G_{\text{int}}^{\ddagger}$<br>(kJ/mol) |
| R243A       | S71A  | 21.45           | -0.06                                                | E171K        | K163D | 5.66            | -7.60                                                |
| R243A       | Y50A  | 6.45            | 0.94                                                 | E168K        | K163D | 4.37            | -7.07                                                |
| R243A       | S35A  | 18.39           | 1.15                                                 | K171E        | F142A | 6.72            | -0.52                                                |
| R243A       | H41A  | 15.23           | -0.51                                                | K168E        | F142A | 6.82            | 0.77                                                 |
| R243A       | S146A | 19.93           | 1.31                                                 | K171E        | Y50A  | 14.38           | 0.31                                                 |
| R243A       | S128A | 25.88           | -0.98                                                | K168E        | Y50A  | 14.68           | -0.29                                                |
| S235A       | S71A  | 21.47           | -0.80                                                | K171E        | S71A  | 24.10           | -0.50                                                |
| S235A       | Y50A  | 6.97            | 0.98                                                 | K168E        | S71A  | 20.83           | 1.09                                                 |
| S235A       | H41A  | 14.46           | -0.06                                                | K171E        | S35A  | 25.14           | -1.18                                                |
| S235A       | S146A | 20.46           | 0.10                                                 | K168E        | S35A  | 22.61           | -0.04                                                |
| S235A       | Y53A  | 14.55           | 0.76                                                 | K171E        | S146A | 11.86           | -1.73                                                |
| S235A       | S128A | 25.53           | -1.29                                                | K168E        | S146A | 8.56            | -0.49                                                |
| S235A       | S35A  | 15.18           | -0.33                                                | K171E        | S128A | 23.24           | -0.48                                                |
| S235A       | F142A | 9.32            | -1.64                                                | K168E        | S128A | 17.30           | 0.37                                                 |
| E104A       | S71A  | 11.97           | 0.22                                                 | K171E        | Y53A  | 18.52           | -0.34                                                |
| E104A       | H41A  | 11.50           | 1.50                                                 | K168E        | Y53A  | 15.93           | -0.61                                                |
| T128A       | S71A  | 17.77           | 0.39                                                 | K171E        | H41A  | 22.36           | -0.83                                                |
| T128A       | Y50A  | 5.89            | 1.57                                                 | K168E        | H41A  | 20.24           | -1.78                                                |
| T128A       | S35A  | 5.15            | -0.28                                                | S124A        | K163D | 23.94           | -0.12                                                |
| T128A       | H41A  | 9.83            | 0.94                                                 | M129A        | K163D | 18.77           | 0.03                                                 |
| T128A       | S128A | 22.45           | -1.38                                                | E104A        | K163D | 7.10            | -3.20                                                |
| T128A       | Y53A  | 11.81           | 0.60                                                 | S235A        | K163D | 19.09           | -0.27                                                |
| T128A       | F142A | 13.73           | -1.76                                                | T128A        | K163D | 22.87           | -0.55                                                |
| S124A       | S71A  | 18.30           | 0.47                                                 | R243A        | K163D | 17.61           | 1.53                                                 |
| S124A       | Y50A  | 9.78            | 1.60                                                 |              |       |                 |                                                      |
| S124A       | H41A  | 12.21           | 0.64                                                 |              |       |                 |                                                      |
| S124A       | S35A  | 4.81            | -0.34                                                |              |       |                 |                                                      |
| S124A       | S146A | 23.03           | 1.44                                                 |              |       |                 |                                                      |
| S124A       | S128A | 21.79           | -1.03                                                |              |       |                 |                                                      |
| S124A       | Y53A  | 13.84           | 0.12                                                 |              |       |                 |                                                      |
| S124A       | F142A | 16.17           | -0.61                                                |              |       |                 |                                                      |
| R243A       | Y53A  | 14.60           | 0.12                                                 |              |       |                 |                                                      |
| R243A       | F142A | 8.37            | -0.61                                                |              |       |                 |                                                      |
| S130A       | Y50A  | 5.31            | 0.69                                                 |              |       |                 |                                                      |
| S130A       | H41A  | 10.22           | 0.42                                                 |              |       |                 |                                                      |
| S130A       | Y53A  | 8.87            | 0.94                                                 |              |       |                 |                                                      |
| S130A       | F142A | 7.74            | -1.25                                                |              |       |                 |                                                      |
| N170A       | F142A | 3.40            | -1.24                                                |              |       |                 |                                                      |
| N170A       | Y50A  | 10.14           | 1.29                                                 |              |       |                 |                                                      |
| N170A       | S146A | 11.77           | 0.78                                                 |              |       |                 |                                                      |
| M129A       | Y50A  | 3.36            | 0.49                                                 |              |       |                 |                                                      |
| M129A       | Y53A  | 7.66            | -1.50                                                |              |       |                 |                                                      |
| M129A       | S35A  | 5.00            | -1.35                                                |              |       |                 |                                                      |
| M129A       | S71A  | 12.41           | -1.25                                                |              |       |                 |                                                      |
